# Supplementary material for: The Effect of La3+ on the Methylene Blue Dye Removal Capacity of the La/ZnTiO3 Photocatalyst, a DFT Study
Source: MDPI journal article supplement (doi:10.3390/nano12183137), 2022-09-10
Supplement: s1 [file s1]

**Table S1.** Relevant interatomic distances for La/ZnTiO<sub>3</sub> surface.

| Atoms      | Bond length (Å)    |                       |
|------------|--------------------|-----------------------|
|            | ZnTiO <sub>3</sub> | La/ZnTiO <sub>3</sub> |
| O1 - Ti8   | 1.68               | 1.69                  |
| O2 - Ti11  | 1.68               | 1.69                  |
| O3 - Ti14  | 1.68               | 1.69                  |
| O4 - Ti17  | 1.69               | 1.78                  |
| O5 - Ti20  | 1.68               | 1.69                  |
| O6 - Ti26  | 1.69               | 1.78                  |
| O7 - Ti29  | 1.68               | 1.69                  |
| O8 - Ti23  | 1.69               | 1.78                  |
| O9 - Ti32  | 1.68               | 1.69                  |
| O10 - Ti35 | 1.68               | 1.69                  |
| O11 - Ti2  | 1.68               | 1.68                  |
| O12 - Ti5  | 1.68               | 1.69                  |

**Table S2.** Bader's charge analysis of the optimized ZnTiO<sub>3</sub> and La/ZnTiO<sub>3</sub> surfaces.

| No. | Atom | X      | Y      | Z     | ZnTiO <sub>3</sub><br>Charge (-e) | La/ZnTiO <sub>3</sub><br>Charge (-e) | Difference<br>Charge (-e) |
|-----|------|--------|--------|-------|-----------------------------------|--------------------------------------|---------------------------|
| 1   | O    | 4.318  | 3.077  | 7.030 | -1.116                            | -1.135                               | -0.019                    |
| 2   | O    | 13.957 | 4.695  | 7.023 | -1.115                            | -1.134                               | -0.019                    |
| 3   | O    | 8.600  | 6.465  | 7.014 | -1.115                            | -1.147                               | -0.032                    |
| 4   | O    | 3.908  | 9.003  | 7.023 | -1.114                            | -1.271                               | -0.157                    |
| 5   | O    | 13.056 | 9.744  | 7.019 | -1.112                            | -1.149                               | -0.037                    |
| 6   | O    | 3.038  | 12.572 | 6.965 | -1.114                            | -1.289                               | -0.176                    |
| 7   | O    | 12.158 | 14.732 | 7.003 | -1.114                            | -1.142                               | -0.028                    |
| 8   | O    | 7.164  | 11.404 | 6.849 | -1.113                            | -1.301                               | -0.188                    |
| 9   | O    | 6.850  | 16.305 | 6.968 | -1.113                            | -1.154                               | -0.041                    |
| 10  | O    | 1.690  | 18.028 | 6.995 | -1.115                            | -1.137                               | -0.022                    |
| 11  | O    | 11.262 | 19.817 | 7.003 | -1.113                            | -1.128                               | -0.015                    |
| 12  | O    | 9.566  | 1.234  | 7.003 | -1.114                            | -1.131                               | -0.017                    |
| 13  | O    | 4.719  | 5.133  | 4.541 | -1.327                            | -1.339                               | -0.012                    |
| 14  | O    | 0.360  | 1.752  | 4.539 | -1.327                            | -1.330                               | -0.003                    |
| 15  | O    | 9.969  | 3.442  | 4.540 | -1.328                            | -1.332                               | -0.004                    |
| 16  | O    | 3.827  | 10.203 | 4.541 | -1.326                            | -1.374                               | -0.049                    |
| 17  | O    | -0.532 | 6.823  | 4.539 | -1.327                            | -1.337                               | -0.010                    |
| 18  | O    | 9.077  | 8.513  | 4.540 | -1.327                            | -1.335                               | -0.008                    |
| 19  | O    | 2.935  | 15.273 | 4.541 | -1.327                            | -1.345                               | -0.018                    |
| 20  | O    | -1.423 | 11.893 | 4.539 | -1.327                            | -1.336                               | -0.010                    |
| 21  | O    | 8.185  | 13.583 | 4.540 | -1.325                            | -1.331                               | -0.006                    |
| 22  | O    | 5.611  | 0.063  | 4.541 | -1.328                            | -1.333                               | -0.004                    |
| 23  | O    | -2.315 | 16.963 | 4.539 | -1.326                            | -1.330                               | -0.004                    |
| 24  | O    | 7.294  | 18.653 | 4.540 | -1.328                            | -1.332                               | -0.004                    |
| 25  | O    | 10.765 | 6.091  | 4.665 | -1.321                            | -1.327                               | -0.006                    |
| 26  | O    | 6.407  | 2.710  | 4.665 | -1.321                            | -1.326                               | -0.005                    |
| 27  | O    | 1.157  | 4.400  | 4.665 | -1.321                            | -1.328                               | -0.007                    |
| 28  | O    | 11.656 | 1.021  | 4.665 | -1.320                            | -1.324                               | -0.004                    |
| 29  | O    | 5.515  | 7.780  | 4.665 | -1.321                            | -1.326                               | -0.005                    |

|    |   |        |        |       |        |        |        |
|----|---|--------|--------|-------|--------|--------|--------|
| 30 | O | 0.265  | 9.470  | 4.665 | -1.320 | -1.337 | -0.018 |
| 31 | O | 4.623  | 12.850 | 4.665 | -1.320 | -1.375 | -0.054 |
| 32 | O | -0.627 | 14.540 | 4.665 | -1.322 | -1.335 | -0.013 |
| 33 | O | 9.873  | 11.161 | 4.665 | -1.321 | -1.346 | -0.025 |
| 34 | O | 3.731  | 17.921 | 4.665 | -1.321 | -1.325 | -0.005 |
| 35 | O | -1.519 | 19.610 | 4.665 | -1.321 | -1.324 | -0.004 |
| 36 | O | 8.981  | 16.231 | 4.665 | -1.320 | -1.328 | -0.009 |
| 37 | O | 12.926 | 4.321  | 4.127 | -1.335 | -1.337 | -0.002 |
| 38 | O | 8.568  | 0.940  | 4.128 | -1.334 | -1.335 | -0.001 |
| 39 | O | 3.318  | 2.629  | 4.127 | -1.334 | -1.337 | -0.002 |
| 40 | O | 12.034 | 9.392  | 4.127 | -1.335 | -1.338 | -0.003 |
| 41 | O | 7.676  | 6.010  | 4.128 | -1.334 | -1.337 | -0.003 |
| 42 | O | 2.426  | 7.699  | 4.127 | -1.334 | -1.355 | -0.021 |
| 43 | O | 11.143 | 14.462 | 4.127 | -1.335 | -1.336 | -0.001 |
| 44 | O | 6.784  | 11.081 | 4.128 | -1.335 | -1.341 | -0.007 |
| 45 | O | 1.535  | 12.769 | 4.127 | -1.333 | -1.341 | -0.007 |
| 46 | O | 10.251 | 19.532 | 4.127 | -1.335 | -1.336 | -0.001 |
| 47 | O | 5.893  | 16.151 | 4.128 | -1.335 | -1.334 | 0.000  |
| 48 | O | 0.643  | 17.839 | 4.127 | -1.333 | -1.335 | -0.002 |
| 49 | O | 13.106 | 1.145  | 2.598 | -1.307 | -1.308 | -0.001 |
| 50 | O | 7.856  | 2.833  | 2.598 | -1.307 | -1.308 | -0.001 |
| 51 | O | 2.607  | 4.522  | 2.597 | -1.307 | -1.310 | -0.003 |
| 52 | O | 12.215 | 6.215  | 2.598 | -1.307 | -1.308 | -0.002 |
| 53 | O | 6.965  | 7.903  | 2.598 | -1.307 | -1.312 | -0.005 |
| 54 | O | 1.715  | 9.592  | 2.597 | -1.307 | -1.312 | -0.005 |
| 55 | O | 6.073  | 12.973 | 2.598 | -1.307 | -1.313 | -0.006 |
| 56 | O | 11.323 | 11.285 | 2.598 | -1.307 | -1.309 | -0.002 |
| 57 | O | 10.431 | 16.355 | 2.598 | -1.306 | -1.308 | -0.002 |
| 58 | O | 5.181  | 18.043 | 2.598 | -1.307 | -1.309 | -0.002 |
| 59 | O | -0.069 | 19.732 | 2.597 | -1.307 | -1.309 | -0.002 |
| 60 | O | 0.823  | 14.662 | 2.597 | -1.307 | -1.310 | -0.003 |
| 61 | O | 11.837 | 3.633  | 1.708 | -1.367 | -1.368 | 0.000  |
| 62 | O | 11.564 | 1.221  | 0.245 | -1.179 | -1.181 | -0.002 |
| 63 | O | 5.128  | 1.515  | 2.237 | -1.330 | -1.330 | 0.000  |
| 64 | O | 4.050  | 4.200  | 0.424 | -1.182 | -1.184 | -0.002 |
| 65 | O | 7.479  | 0.251  | 1.709 | -1.367 | -1.367 | 0.000  |
| 66 | O | 6.317  | 2.905  | 0.248 | -1.179 | -1.181 | -0.002 |
| 67 | O | -0.120 | 3.209  | 2.237 | -1.331 | -1.329 | 0.002  |
| 68 | O | 14.547 | 0.823  | 0.423 | -1.181 | -1.182 | -0.001 |
| 69 | O | 2.228  | 1.942  | 1.708 | -1.367 | -1.368 | 0.000  |
| 70 | O | 1.065  | 4.601  | 0.245 | -1.179 | -1.180 | -0.002 |
| 71 | O | 9.488  | 4.897  | 2.237 | -1.331 | -1.330 | 0.001  |
| 72 | O | 9.297  | 2.512  | 0.423 | -1.181 | -1.183 | -0.002 |
| 73 | O | 10.946 | 8.703  | 1.708 | -1.367 | -1.369 | -0.001 |
| 74 | O | 10.672 | 6.291  | 0.245 | -1.179 | -1.181 | -0.002 |
| 75 | O | 4.236  | 6.585  | 2.237 | -1.330 | -1.331 | -0.001 |
| 76 | O | 3.158  | 9.270  | 0.424 | -1.182 | -1.187 | -0.005 |
| 77 | O | 6.587  | 5.321  | 1.709 | -1.367 | -1.368 | -0.001 |
| 78 | O | 5.425  | 7.976  | 0.248 | -1.179 | -1.180 | -0.001 |

|     |    |        |        |       |        |        |        |
|-----|----|--------|--------|-------|--------|--------|--------|
| 79  | O  | -1.012 | 8.279  | 2.237 | -1.331 | -1.329 | 0.002  |
| 80  | O  | 13.655 | 5.893  | 0.423 | -1.181 | -1.183 | -0.001 |
| 81  | O  | 1.336  | 7.012  | 1.708 | -1.367 | -1.369 | -0.002 |
| 82  | O  | 0.173  | 9.671  | 0.245 | -1.179 | -1.182 | -0.003 |
| 83  | O  | 8.596  | 9.967  | 2.237 | -1.330 | -1.332 | -0.001 |
| 84  | O  | 8.405  | 7.583  | 0.423 | -1.181 | -1.182 | -0.001 |
| 85  | O  | 10.054 | 13.774 | 1.708 | -1.367 | -1.369 | -0.001 |
| 86  | O  | 9.781  | 11.361 | 0.245 | -1.179 | -1.181 | -0.002 |
| 87  | O  | 3.345  | 11.655 | 2.237 | -1.330 | -1.330 | 0.001  |
| 88  | O  | 2.266  | 14.341 | 0.424 | -1.182 | -1.184 | -0.003 |
| 89  | O  | 5.695  | 10.391 | 1.709 | -1.367 | -1.374 | -0.006 |
| 90  | O  | 4.533  | 13.046 | 0.248 | -1.180 | -1.181 | -0.001 |
| 91  | O  | -1.903 | 13.349 | 2.237 | -1.331 | -1.328 | 0.003  |
| 92  | O  | 12.763 | 10.963 | 0.423 | -1.181 | -1.182 | -0.001 |
| 93  | O  | 0.444  | 12.082 | 1.708 | -1.367 | -1.370 | -0.002 |
| 94  | O  | -0.719 | 14.741 | 0.245 | -1.179 | -1.181 | -0.002 |
| 95  | O  | 7.704  | 15.037 | 2.237 | -1.331 | -1.332 | -0.002 |
| 96  | O  | 7.513  | 12.653 | 0.423 | -1.181 | -1.184 | -0.003 |
| 97  | O  | 9.162  | 18.844 | 1.708 | -1.367 | -1.368 | -0.001 |
| 98  | O  | 8.889  | 16.431 | 0.245 | -1.179 | -1.181 | -0.002 |
| 99  | O  | 2.453  | 16.726 | 2.237 | -1.330 | -1.330 | 0.000  |
| 100 | O  | 1.374  | 19.411 | 0.424 | -1.182 | -1.183 | -0.002 |
| 101 | O  | 4.803  | 15.461 | 1.709 | -1.367 | -1.370 | -0.003 |
| 102 | O  | 3.641  | 18.116 | 0.248 | -1.179 | -1.181 | -0.002 |
| 103 | O  | -2.795 | 18.419 | 2.237 | -1.331 | -1.330 | 0.001  |
| 104 | O  | 11.871 | 16.033 | 0.423 | -1.181 | -1.183 | -0.001 |
| 105 | O  | -0.448 | 17.152 | 1.708 | -1.367 | -1.368 | -0.001 |
| 106 | O  | -1.611 | 19.811 | 0.245 | -1.179 | -1.180 | -0.002 |
| 107 | O  | 6.812  | 20.108 | 2.237 | -1.331 | -1.329 | 0.001  |
| 108 | O  | 6.621  | 17.723 | 0.423 | -1.181 | -1.182 | -0.001 |
| 109 | Zn | 9.311  | 1.471  | 2.148 | 1.325  | 1.323  | -0.002 |
| 110 | Zn | 0.790  | 2.602  | 0.429 | 1.214  | 1.208  | -0.006 |
| 111 | Zn | 3.660  | 0.589  | 4.267 | 1.299  | 1.293  | -0.005 |
| 112 | Zn | 4.063  | 3.161  | 2.150 | 1.325  | 1.322  | -0.003 |
| 113 | Zn | 10.398 | 4.292  | 0.429 | 1.214  | 1.208  | -0.005 |
| 114 | Zn | 13.268 | 2.281  | 4.267 | 1.300  | 1.296  | -0.004 |
| 115 | Zn | 13.670 | 4.853  | 2.149 | 1.325  | 1.323  | -0.002 |
| 116 | Zn | 6.041  | 0.910  | 0.429 | 1.215  | 1.208  | -0.006 |
| 117 | Zn | 8.019  | 3.970  | 4.267 | 1.300  | 1.295  | -0.005 |
| 118 | Zn | 8.419  | 6.541  | 2.148 | 1.325  | 1.323  | -0.003 |
| 119 | Zn | -0.102 | 7.673  | 0.429 | 1.214  | 1.208  | -0.006 |
| 120 | Zn | 2.769  | 5.659  | 4.267 | 1.300  | 1.273  | -0.027 |
| 121 | Zn | 3.171  | 8.231  | 2.150 | 1.325  | 1.315  | -0.010 |
| 122 | Zn | 9.506  | 9.363  | 0.429 | 1.214  | 1.207  | -0.006 |
| 123 | Zn | 12.376 | 7.351  | 4.267 | 1.301  | 1.296  | -0.005 |
| 124 | Zn | 12.778 | 9.923  | 2.149 | 1.325  | 1.321  | -0.004 |
| 125 | Zn | 5.149  | 5.980  | 0.429 | 1.215  | 1.207  | -0.008 |
| 126 | Zn | 7.127  | 9.040  | 4.267 | 1.299  | 1.279  | -0.020 |
| 127 | Zn | 7.527  | 11.611 | 2.148 | 1.326  | 1.320  | -0.006 |

|     |    |        |        |       |       |       |        |
|-----|----|--------|--------|-------|-------|-------|--------|
| 128 | Zn | -0.994 | 12.743 | 0.429 | 1.214 | 1.208 | -0.006 |
| 129 | Zn | 1.877  | 10.729 | 4.267 | 1.302 | 1.287 | -0.015 |
| 130 | Zn | 2.279  | 13.301 | 2.150 | 1.325 | 1.317 | -0.008 |
| 131 | Zn | 8.615  | 14.432 | 0.429 | 1.214 | 1.206 | -0.007 |
| 132 | Zn | 11.484 | 12.421 | 4.267 | 1.301 | 1.293 | -0.008 |
| 133 | Zn | 11.886 | 14.993 | 2.149 | 1.325 | 1.321 | -0.004 |
| 134 | Zn | 4.257  | 11.050 | 0.429 | 1.215 | 1.205 | -0.010 |
| 135 | Zn | 6.235  | 14.110 | 4.267 | 1.301 | 1.282 | -0.019 |
| 136 | Zn | 6.635  | 16.681 | 2.148 | 1.325 | 1.322 | -0.003 |
| 137 | Zn | -1.886 | 17.813 | 0.429 | 1.214 | 1.207 | -0.007 |
| 138 | Zn | 0.985  | 15.800 | 4.267 | 1.301 | 1.293 | -0.008 |
| 139 | Zn | 1.388  | 18.372 | 2.150 | 1.325 | 1.322 | -0.002 |
| 140 | Zn | 7.723  | 19.503 | 0.429 | 1.214 | 1.208 | -0.006 |
| 141 | Zn | 10.593 | 17.491 | 4.267 | 1.301 | 1.299 | -0.003 |
| 142 | Zn | 10.994 | 20.063 | 2.149 | 1.325 | 1.323 | -0.002 |
| 143 | Zn | 3.365  | 16.120 | 0.429 | 1.215 | 1.206 | -0.009 |
| 144 | Zn | 5.343  | 19.181 | 4.267 | 1.300 | 1.298 | -0.002 |
| 145 | Ti | 12.871 | 2.166  | 1.038 | 2.515 | 2.509 | -0.006 |
| 146 | Ti | -3.244 | 20.151 | 5.389 | 2.512 | 2.512 | 0.000  |
| 147 | Ti | 6.624  | 1.259  | 3.365 | 2.593 | 2.587 | -0.006 |
| 148 | Ti | 7.622  | 3.854  | 1.038 | 2.515 | 2.508 | -0.007 |
| 149 | Ti | 9.930  | 1.560  | 5.390 | 2.511 | 2.513 | 0.002  |
| 150 | Ti | 1.375  | 2.950  | 3.364 | 2.594 | 2.588 | -0.006 |
| 151 | Ti | 3.263  | 0.475  | 1.039 | 2.515 | 2.507 | -0.008 |
| 152 | Ti | 4.682  | 3.248  | 5.390 | 2.514 | 2.510 | -0.004 |
| 153 | Ti | 10.983 | 4.640  | 3.365 | 2.594 | 2.587 | -0.006 |
| 154 | Ti | 11.979 | 7.236  | 1.038 | 2.515 | 2.507 | -0.007 |
| 155 | Ti | -0.569 | 4.941  | 5.389 | 2.514 | 2.511 | -0.003 |
| 156 | Ti | 5.732  | 6.329  | 3.365 | 2.593 | 2.558 | -0.035 |
| 157 | Ti | 6.731  | 8.924  | 1.038 | 2.515 | 2.502 | -0.014 |
| 158 | Ti | 9.039  | 6.630  | 5.390 | 2.513 | 2.507 | -0.006 |
| 159 | Ti | 0.483  | 8.020  | 3.364 | 2.594 | 2.570 | -0.025 |
| 160 | Ti | 2.371  | 5.546  | 1.039 | 2.515 | 2.507 | -0.008 |
| 161 | Ti | 3.790  | 8.318  | 5.390 | 2.513 | 2.402 | -0.111 |
| 162 | Ti | 10.091 | 9.711  | 3.365 | 2.593 | 2.567 | -0.026 |
| 163 | Ti | 11.087 | 12.306 | 1.038 | 2.515 | 2.505 | -0.010 |
| 164 | Ti | -1.461 | 10.011 | 5.389 | 2.511 | 2.512 | 0.001  |
| 165 | Ti | 4.841  | 11.399 | 3.365 | 2.593 | 2.500 | -0.093 |
| 166 | Ti | 5.839  | 13.994 | 1.038 | 2.515 | 2.497 | -0.018 |
| 167 | Ti | 8.147  | 11.700 | 5.390 | 2.511 | 2.428 | -0.084 |
| 168 | Ti | -0.408 | 13.091 | 3.364 | 2.594 | 2.569 | -0.025 |
| 169 | Ti | 1.479  | 10.616 | 1.039 | 2.515 | 2.495 | -0.020 |
| 170 | Ti | 2.898  | 13.388 | 5.390 | 2.513 | 2.407 | -0.107 |
| 171 | Ti | 9.199  | 14.781 | 3.365 | 2.593 | 2.563 | -0.030 |
| 172 | Ti | 10.196 | 17.376 | 1.038 | 2.515 | 2.508 | -0.006 |
| 173 | Ti | -2.352 | 15.081 | 5.389 | 2.513 | 2.513 | 0.000  |
| 174 | Ti | 3.949  | 16.469 | 3.365 | 2.593 | 2.573 | -0.019 |
| 175 | Ti | 4.947  | 19.065 | 1.038 | 2.515 | 2.508 | -0.008 |
| 176 | Ti | 7.255  | 16.770 | 5.390 | 2.511 | 2.516 | 0.005  |

|     |    |        |        |       |       |       |        |
|-----|----|--------|--------|-------|-------|-------|--------|
| 177 | Ti | -1.300 | 18.161 | 3.364 | 2.594 | 2.587 | -0.007 |
| 178 | Ti | 0.587  | 15.686 | 1.039 | 2.515 | 2.504 | -0.011 |
| 179 | Ti | 2.006  | 18.458 | 5.390 | 2.513 | 2.512 | -0.001 |
| 180 | Ti | 8.307  | 19.851 | 3.365 | 2.594 | 2.587 | -0.007 |
| 181 | La | 4.833  | 11.123 | 7.213 | -     | 2.150 | 2.150  |
